# Supplementary material for: Inhibition of O‐GlcNAcylation protects from Shiga toxin‐mediated cell injury and lethality in host
Source: EMBO Mol Med. 2021 Nov 29;14(1):e14678. doi: 10.15252/emmm.202114678 (PMC8749473; doi:10.15252/emmm.202114678)
Supplement: Supplementary file 1 — Expanded View Figures PDF [file EMMM-14-e14678-s010.pdf]

## Expanded View Figures

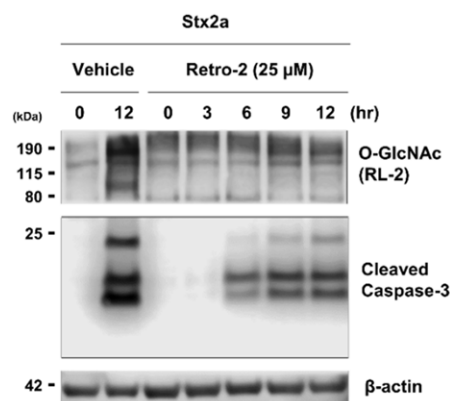

**Figure EV1. Inhibition of retrograde trafficking blocks the aberrant Stx2a-induced increase in cellular O-GlcNAcylation and consequently delays caspase-3 activation.**

Representative western blot showing changes in O-GlcNAcylation and caspase-3 activation in THP-1 cells treated with Stx2a (10 ng/ml) for 12 h in the presence or absence of the retrograde trafficking inhibitor Retro-2 (25  $\mu$ M final).

Source data are available online for this figure.

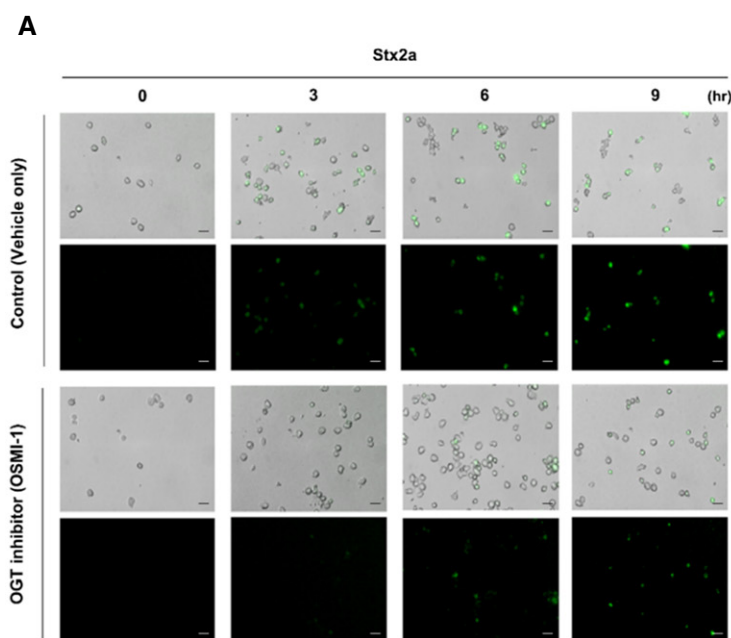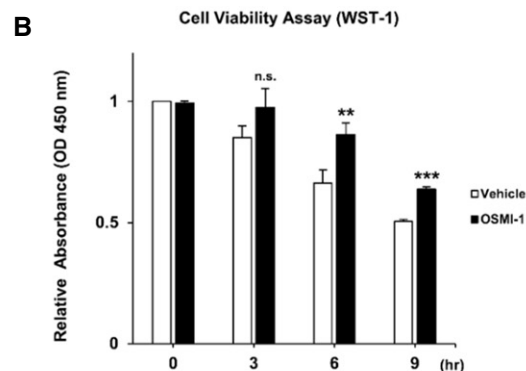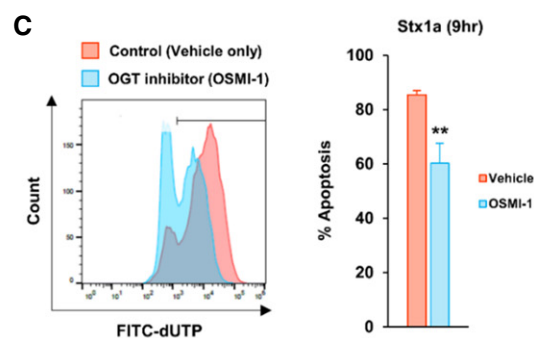

**Figure EV2. Suppression of Stx2a- and Stx1a-induced O-GlcNAcylation rescues cells from apoptosis.**

- A Representative images showing TUNEL staining of Stx2a-treated THP-1 cells cultured in the presence of OSMI-1 or the vehicle control at 0, 3, 6, and 9 h time point each. FITC-dUTP staining (green fluorescence) in the TUNEL assay indicates active progression of apoptosis. Scale bars: 40  $\mu$ m.
- B WST-1 dye-based cell viability assay of Stx2a-exposed THP-1 cells treated with or without OSMI-1 (10  $\mu$ M final) at 0, 3, 6, and 9 h time point each ( $n = 3$  biological replicates).
- C Representative flow cytometric plot showing apoptosis progression in THP-1 cells detected by TUNEL upon treatment with Stx1a (100 ng/ml) in the presence or absence of OSMI-1 (10  $\mu$ M final), and quantification of the percentage of apoptotic cells at 9 h ( $n = 3$  biological replicates). The effects of OSMI-1 treatment were compared with those of the vehicle (DMSO) control.

Data information: Error bars for bar graphs are presented as mean  $\pm$  SD. Statistical analysis was performed using two-tailed Student's  $t$ -test. \* $P < 0.05$ ; \*\* $P < 0.01$ ; and \*\*\* $P < 0.001$ .

Source data are available online for this figure.

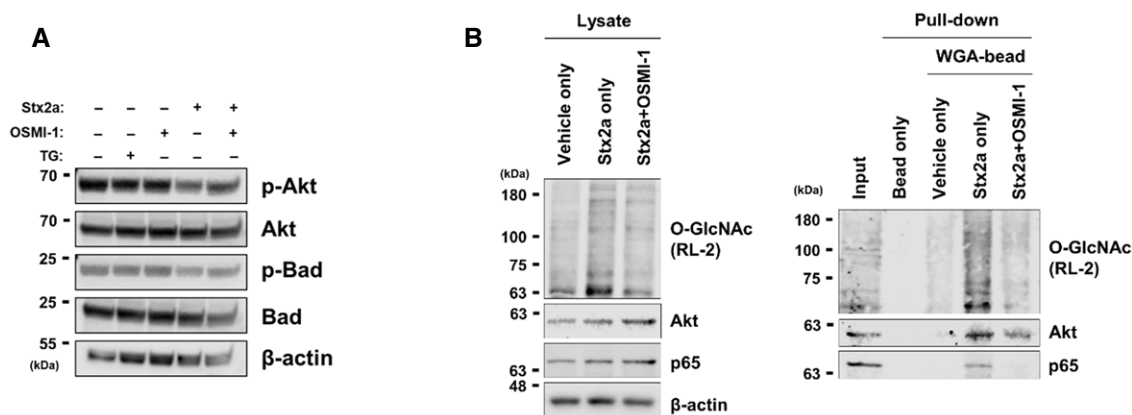

**Figure EV3. Akt and p65 were directly O-GlcNAcylated in Stx2a-treated THP-1 cells.**

- A Representative western blot showing changes in phosphorylation status of Akt or Bad in THP-1 cells treated with Stx2a (10 ng/ml) for 3 h in the presence or absence of OSMI-1 (10  $\mu$ M, final) or OGA inhibitor Thiamet G (2  $\mu$ M, final).
- B Representative western blot images, before (left) and after (right) pull down using WGA-lectin conjugated to agarose beads or bead-only control, to determine O-GlcNAc attachment to Akt and p65 in lysates from Stx2a (10 ng/ml)-exposed THP-1 cells for 9 h in the presence or absence of OSMI-1 (10  $\mu$ M, final).

Source data are available online for this figure.

A

Immune response

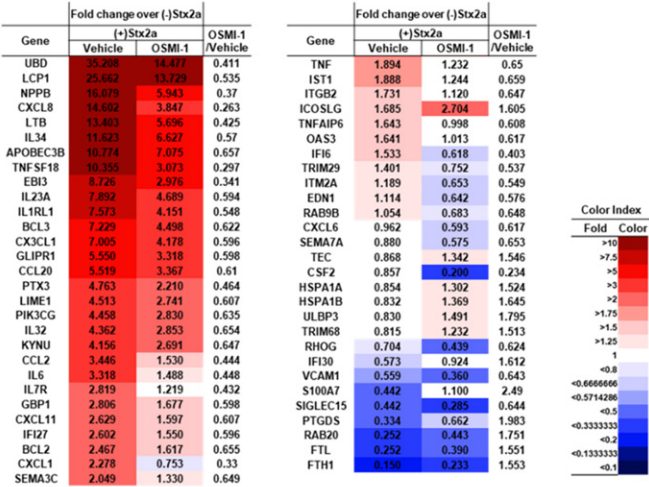

Figure EV4. Stx2a-mediated immune responses in primary human renal cells are regulated through O-GlcNAcylation.

- A Heatmaps representing the comparative expression levels for DEGs in the presence or absence of OSMI-1 treatment upon Stx2a intoxication related to the immune responses.
- B Heatmaps representing the comparative expression levels for DEGs in the presence or absence of OSMI-1 treatment without Stx2a exposure related to the inflammatory response (left) and apoptotic process (right).

Data information: The numbers within the tables are normalized gene expression level compared to HRPTEpi cells maintained in the absence of either Stx2a or OSMI-1. Expression values are represented with red (upregulation) or blue (downregulation) color using FPKM values by Cufflinks; the cutoffs used a fold change of at least 1.5 followed by pairwise comparison and Student's t-test with a Benjamini and Hochberg correction. The FPKM values were normalized using EdgeR within R and visualized using ExDEGA. Data are the means from two independent replicates.

B

Inflammatory response

Apoptotic process

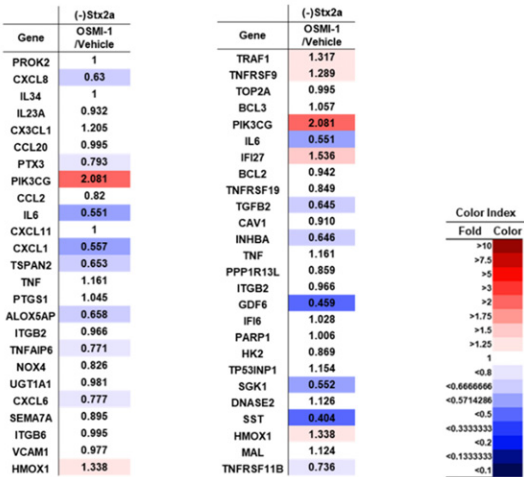

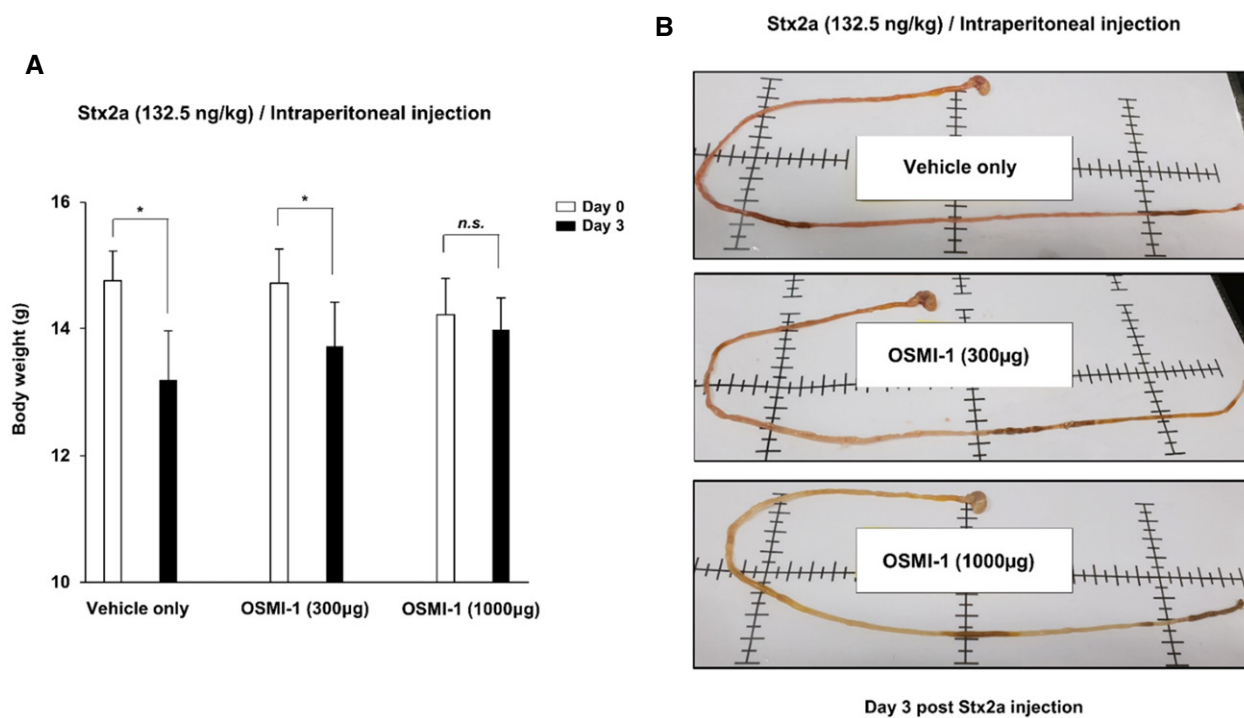

**Figure EV5.** Treatment with an OGT inhibitor improves severe loss of body weight due to the hemorrhagic symptoms in the intestines of mice challenged with Stx2a.

A Body weight changes in mice challenged with Stx2a in the presence or absence of OSMI-1 (300 or 1,000 µg/mouse). Data are presented as mean  $\pm$  SD ( $n = 5$  biological replicates per group, two-tailed Student's  $t$ -test). Comparisons between days 0 and 3 were indicated for each group. \* $P < 0.05$ ; \*\* $P < 0.01$ ; and \*\*\* $P < 0.001$ .

B Representative images of the intestines of mice at day 3 after Stx2a injection and combinatorial treatment with two doses of OSMI-1 or the vehicle alone. Source data are available online for this figure.
